# Supplementary material for: Analysis of abnormal posture in patients with Parkinson's disease using a computational model considering muscle tones
Source: Front Comput Neurosci. 2023 Oct 5;17:1218707. doi: 10.3389/fncom.2023.1218707 (PMC10585043; doi:10.3389/fncom.2023.1218707)
Supplement: Supplementary file 5 [file Table_1.XLSX]

## Sheet: Sheet1
subject	uff	knee_angle_r [deg]	knee_angle_l [deg]	lumbar_extension [deg]
sub1	1.90563	2.52333	2.63877	2.09932
sub1	4.12608	34.4948	32.2446	20.8458
sub1	6.04319	4.97235	4.85015	5.02531
sub1	8.00226	5.76131	6.85426	6.46828
sub1	ex	0	0	0
sub2	2.13238	1.18623	0.737329	5.4856
sub2	3.99686	0.404011	0.0243166	4.67171
sub2	5.84685	1.10969	0.792519	3.01583
sub2	8.07407	0.390554	0.142399	2.96049
sub2	ex	0	0	0
sub3	2.00636	2.75816	0.937859	10.1794
sub3	3.92782	1.53572	1.55019	0.873562
sub3	5.96862	3.86991	2.97094	5.35461
sub3	7.98947	3.03549	2.65966	3.23391
sub3	ex	0	0	0
sub4	2.11216	6.18456	6.35832	9.49913
sub4	3.85487	51.2526	54.216	11.4437
sub4	6.02825	6.78418	8.95606	5.04036
sub4	7.96461	55.5069	55.8897	17.5835
sub4	ex	0	0	0
sub5	1.92735	23.8691	31.9053	24.2185
sub5	3.76019	5.42126	6.07139	4.42137
sub5	6.39166	11.4634	29.9673	13.1139
sub5	8.19754	5.23608	4.71965	1.80321
sub5	ex	0	0	0
sub6	2.01829	20.7793	27.7584	1.59498
sub6	3.92448	2.92802	3.38833	1.52698
sub6	5.88344	1.03911	0.307666	1.07731
sub6	7.9452	6.64469	4.92112	0.628461
sub6	ex	0	0	0
sub7	2.26633	6.89503	25.945	5.63055
sub7	3.9627	2.07514	27.1678	3.19935
sub7	5.88102	2.65655	3.19714	4.19558
sub7	8.16418	1.05611	28.0116	5.90127
sub7	ex	0	0	0
sub8	2.06404	2.85308	1.46273	4.52995
sub8	3.62685	8.87212	8.09925	2.18124
sub8	5.91347	3.45813	3.37783	2.15785
sub8	8.06513	3.76786	4.2172	2.27387
sub8	ex	0	0	0
