# Supplementary material for: Analysis of abnormal posture in patients with Parkinson's disease using a computational model considering muscle tones
Source: Front Comput Neurosci. 2023 Oct 5;17:1218707. doi: 10.3389/fncom.2023.1218707 (PMC10585043; doi:10.3389/fncom.2023.1218707)
Supplement: Supplementary file 6 [file Table_2.XLSX]

## Sheet: Sheet1
		pelvis_tilt	pelvis_list	pelvis_rotation	pelvis_ty	hip_flexion_r	hip_adduction_r	hip_rotation_r	knee_angle_r	subtalar_angle_1_r	ankle_angle_r	hip_flexion_l	hip_adduction_l	hip_rotation_l	knee_angle_l	subtalar_angle_1_l	ankle_angle_l	lumbar_extension	lumbar_bending	lumbar_rotation	neck_extension	roll	yaw	neck_extension_2	roll_2	yaw_2
sub1	original	11.7851	0.827529	3.3025	0.910469	1.51295	-2.53219	-16.4106	-26.5871	9.89627	19.8707	0.661536	-2.11623	-16.2648	-17.4768	3.65998	11.2055	-69.5034	-4.99213	-4.86291	-14.33	0.269384	-0.235367	24	-0.0183557	-0.115198
	adjusted	11.7851	0.827529	3.3025	0.916718	0.728	-2.53219	-16.4106	-23.7376	4.44681	10.1977	2.44245	-2.11623	-16.2648	-20.5109	3.66227	5.39607	-69.5032	-4.99213	-4.86291	-14.33	0.269384	-0.235367	24	-0.0183562	-0.115198
sub2	original	12.354	-5.97303	-10.977	0.834206	4.24884	1.12494	-1.63807	-30.8136	4.49296	19.9046	-7.79011	-4.57679	-18.3852	-17.2812	5.97693	16.9833	-42.7941	-2.16287	5.60462	-22.9931	3.67217	-6.53229	24	-1.84826	-3.03112
	adjusted	12.354	-5.97303	-10.977	0.807073	6.21132	1.12494	-1.63807	-33.6731	7.87794	12.9235	-7.98268	-4.57679	-18.3852	-15.9338	5.27758	9.54284	-42.7941	-2.16287	5.60462	-22.9931	3.67217	-6.53229	24	-1.84826	-3.03112
sub3	original	5.9523	-5.55929	-173.301	0.875242	5.78568	-7.20077	-1.33668	-12.0891	-2.91231	10.911	6.17155	3.64301	4.39675	-11.0366	1.42807	9.578	-3.69584	-1.47416	-4.85779	-20.5096	2.98721	3.0795	24	0.649977	0.659375
	adjusted	5.9523	-5.55929	-173.301	0.875242	5.78568	-7.20077	-1.33668	-12.0891	-2.91231	10.911	6.17155	3.64301	4.39675	-11.0366	1.42807	9.578	-3.69584	-1.47416	-4.85779	-20.5096	2.98721	3.0795	24	0.649977	0.659375
sub4	original	-1.11839	-8.34373	-3.30091	0.7523	30.3088	7.8905	2.59579	-44.3069	2.86725	18.5753	29.4504	-8.2834	-3.44976	-45.2561	-4.7093	16.3525	-61.9942	6.73022	17.2602	-33	18.1574	-19.1895	21.4462	-1.289	2.59727
	adjusted	-1.118	-8.34399	-3.301	0.780995	30.4265	7.89049	2.5958	-44.0739	8.73108	13.4871	28.5911	-8.28342	-3.44976	-43.6763	3.37885	14.9109	-61.994	6.73019	17.2602	-33	18.1574	-19.1895	21.4462	-1.289	2.59727
sub5	original	4.56893	-1.06409	-5.38144	0.890053	-0.942452	1.91191	-3.23623	-14.0314	3.05623	10.7017	-1.4925	0.921219	-14.8166	-14.028	-0.253632	12.8348	-10.1549	-1.88296	6.9968	-7.80458	-2.40947	0.493392	24	-0.952479	-0.137853
	adjusted	4.569	-1.064	-5.381	0.892726	-1.49131	1.91191	-3.23623	-12.7098	3.89606	9.03658	1.7556	0.921219	-14.8166	-19.6955	2.27856	13.1977	-10.1549	-1.88296	6.99679	-7.8046	-2.40948	0.493392	24	-0.95248	-0.137854
sub6	original	0.85514	1.2336	2.78682	0.88934	0.809194	-0.0788967	0.779843	-9.42229	-5.37945	3.90157	0.919868	2.35759	-3.61365	-9.97798	-9.85349	5.57932	-12.5665	-2.76669	8.2448	-8.78386	2.94174	-0.699317	24	0.338104	-0.0949981
	adjusted	0.855002	1.234	2.787	0.900595	0.566487	-0.0788969	0.779842	-8.99968	4.18515	6.98659	3.78427	2.35759	-3.61365	-15.7074	3.79639	10.6095	-12.5665	-2.76669	8.24481	-8.78385	2.94174	-0.699318	24	0.338104	-0.0949981
sub7	original	19.339	-1.81929	-2.0679	0.905152	-10.9024	-0.499516	-2.62685	-24.6734	-12.4092	22.798	-13.204	1.86519	-6.27709	-22.028	-7.83987	17.8121	-41.3321	3.18013	2.82493	28.0193	-0.375475	3.50024	-12.4924	-0.774281	0.672682
	adjusted	19.339	-1.8193	-2.0679	0.913137	-7.03638	-0.499517	-2.62685	-26.7424	4.77949	13.7344	-13.7209	1.86518	-6.2771	-16.4029	1.86538	10.433	-41.3322	3.18013	2.82493	28.0193	-0.375475	3.50024	-12.4924	-0.774284	0.672681
sub8	original	12.3681	6.33266	0.045626	0.907703	0.966051	-8.30839	-9.97175	-31.7353	0.857706	14.1232	-3.39758	4.23924	-10.6081	-23.6438	4.29488	13.2427	-20.7462	-6.48165	-4.06582	2.91705	3.3405	3.62536	4.89027	0.963064	-0.971257
	adjusted	12.368	6.33302	0.0459999	0.90763	-0.335404	-8.30841	-9.97176	-29.1206	4.95775	16.5037	-6.16869	4.23924	-10.6081	-18.8648	6.27349	11.6583	-20.7462	-6.48164	-4.06582	2.91705	3.3405	3.62536	4.89027	0.963062	-0.971255
